# Supplementary material for: Dynamic 1D search and processive nucleosome translocations by RSC and ISW2 chromatin remodelers
Source: PubMed Central journal article supplement (PMC10948146; doi:10.7554/elife.91433), 2024-03-18

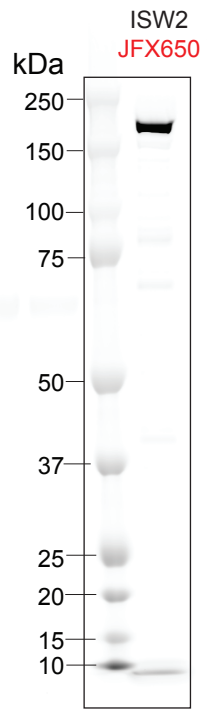

Supplement: elife-91433-fig1-figsupp1-data8.pdf [file elife-91433-fig1-figsupp1-data8.pdf]
