# Supplementary material for: Dynamic 1D search and processive nucleosome translocations by RSC and ISW2 chromatin remodelers
Source: PubMed Central journal article supplement (PMC10948146; doi:10.7554/elife.91433), 2024-03-18
Supplement: elife-91433-fig1-figsupp2-data6.pdf [file elife-91433-fig1-figsupp2-data6.pdf]

RSC labeling efficiency

**JFX650**

kDa                      **2**    **5**     $\mu\text{M}$

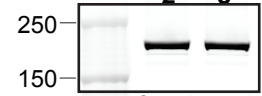

Cy5 channel  
excitation

250—  
150—

100—  
75—

50—  
37—

25—  
20—

15—  
10—

10—

10—

10—

10—
