# Supplementary material for: Dynamic 1D search and processive nucleosome translocations by RSC and ISW2 chromatin remodelers
Source: PubMed Central journal article supplement (PMC10948146; doi:10.7554/elife.91433), 2024-03-18
Supplement: elife-91433-fig1-figsupp2-data13.pdf [file elife-91433-fig1-figsupp2-data13.pdf]

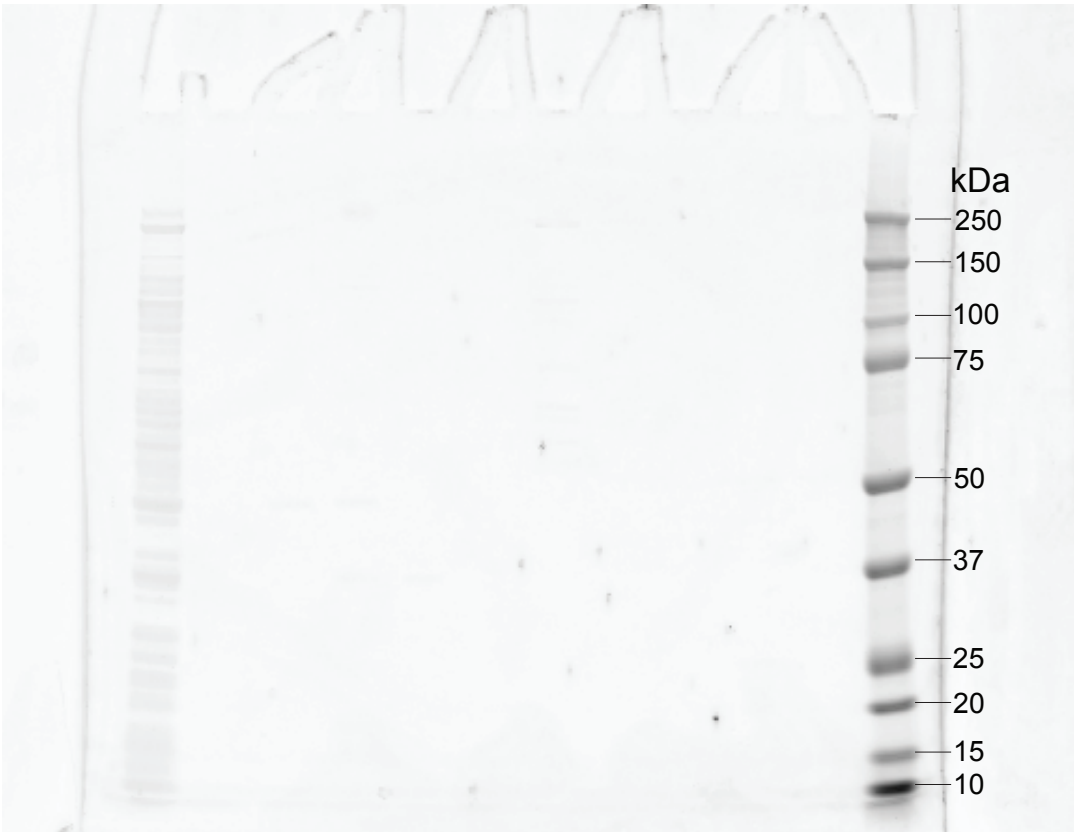

kDa  
—250  
—150  
—100  
—75  
—50  
—37  
—25  
—20  
—15  
—10

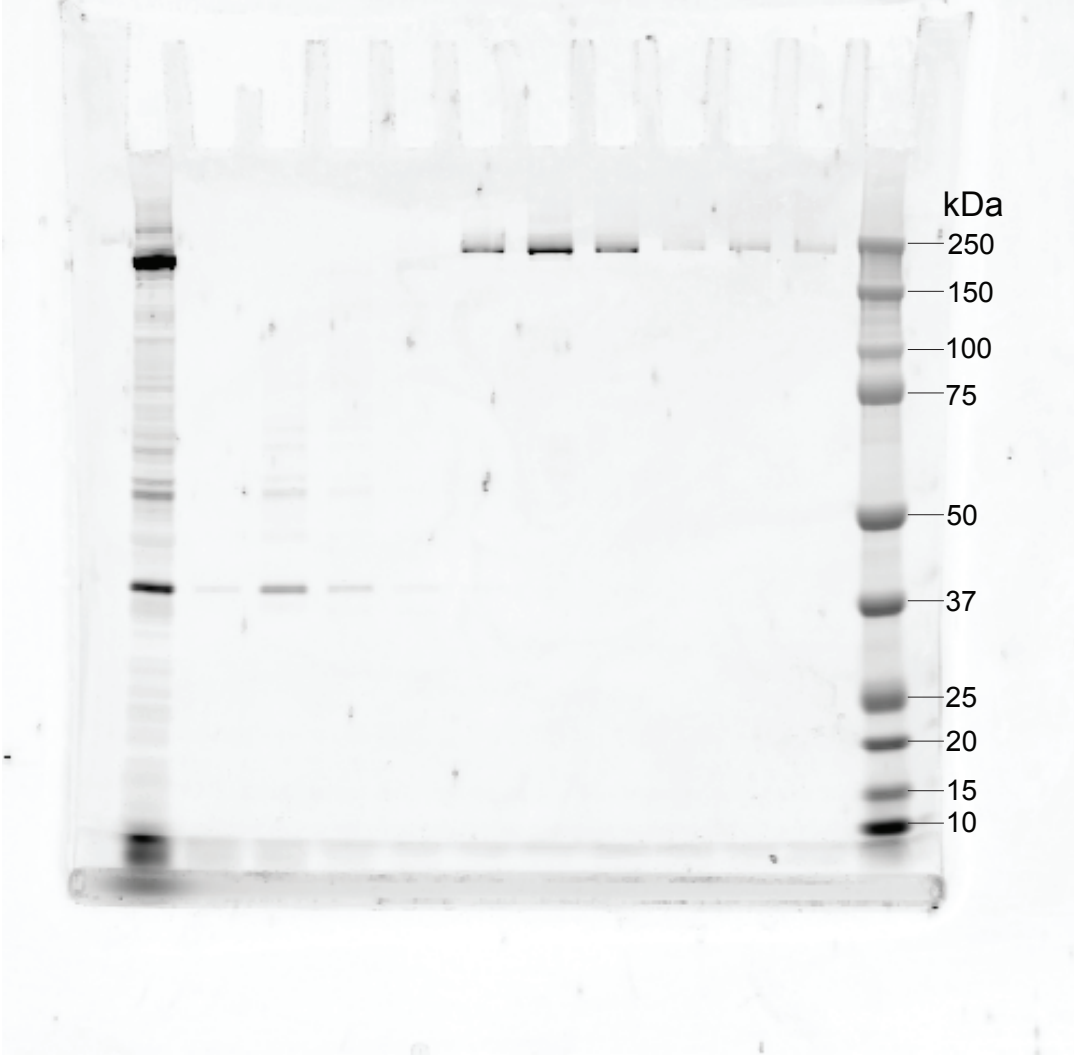

kDa  
—250  
—150  
—100  
—75  
—50  
—37  
—25  
—20  
—15  
—10
