# Supplementary material for: Dynamic 1D search and processive nucleosome translocations by RSC and ISW2 chromatin remodelers
Source: eLife journal article supplement (doi:10.7554/elife.91433), 2023-11-23

RSC labeling efficiency

**JFX554**

**2 5  $\mu$ M**

kDa

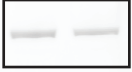

Cy3 channel  
excitation

75

25

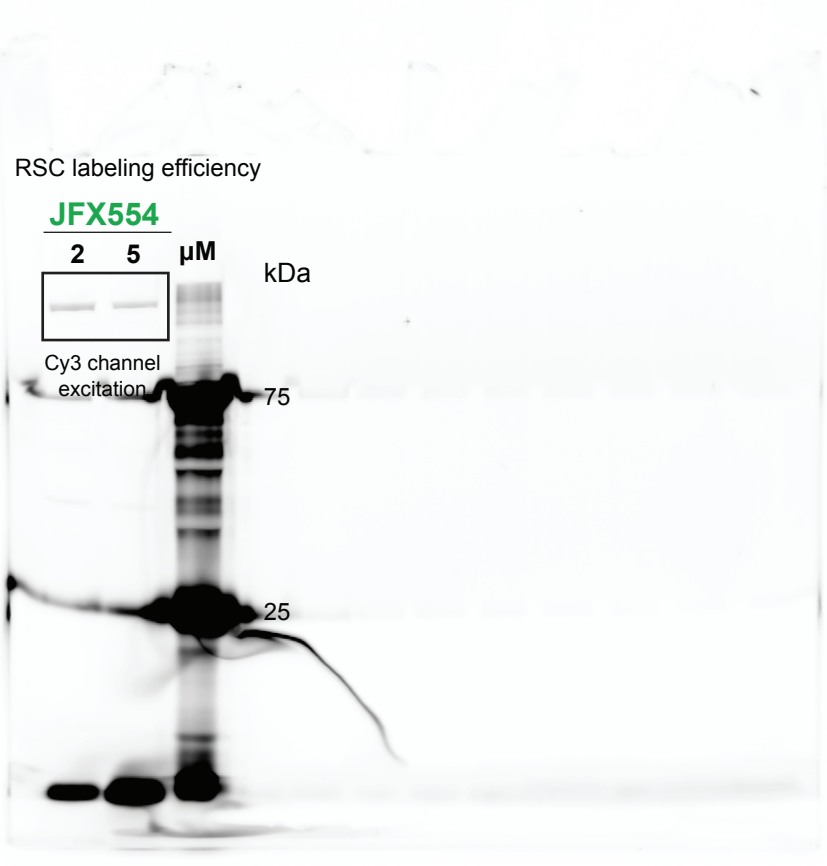

Supplement: fig1-figsupp2-data8 [file elife-91433-fig1-figsupp2-data8-v1.pdf]
