# Supplementary material for: Dynamic 1D search and processive nucleosome translocations by RSC and ISW2 chromatin remodelers
Source: eLife journal article supplement (doi:10.7554/elife.91433), 2023-11-23

RSC labeling efficiency

**JFX554**

**JFX650**

2

5

2

5

$\mu\text{M}$

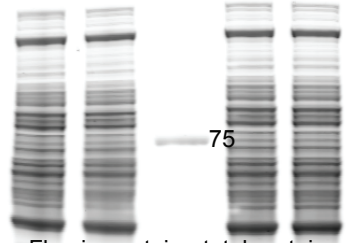

Flamingo stain - total protein

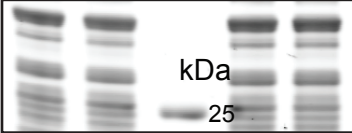

Supplement: fig1-figsupp2-data10 [file elife-91433-fig1-figsupp2-data10-v1.pdf]
