# Supplementary material for: Dynamic 1D search and processive nucleosome translocations by RSC and ISW2 chromatin remodelers
Source: eLife journal article supplement (doi:10.7554/elife.91433), 2023-11-23
Supplement: fig1-figsupp2-data12 [file elife-91433-fig1-figsupp2-data12-v1.pdf]

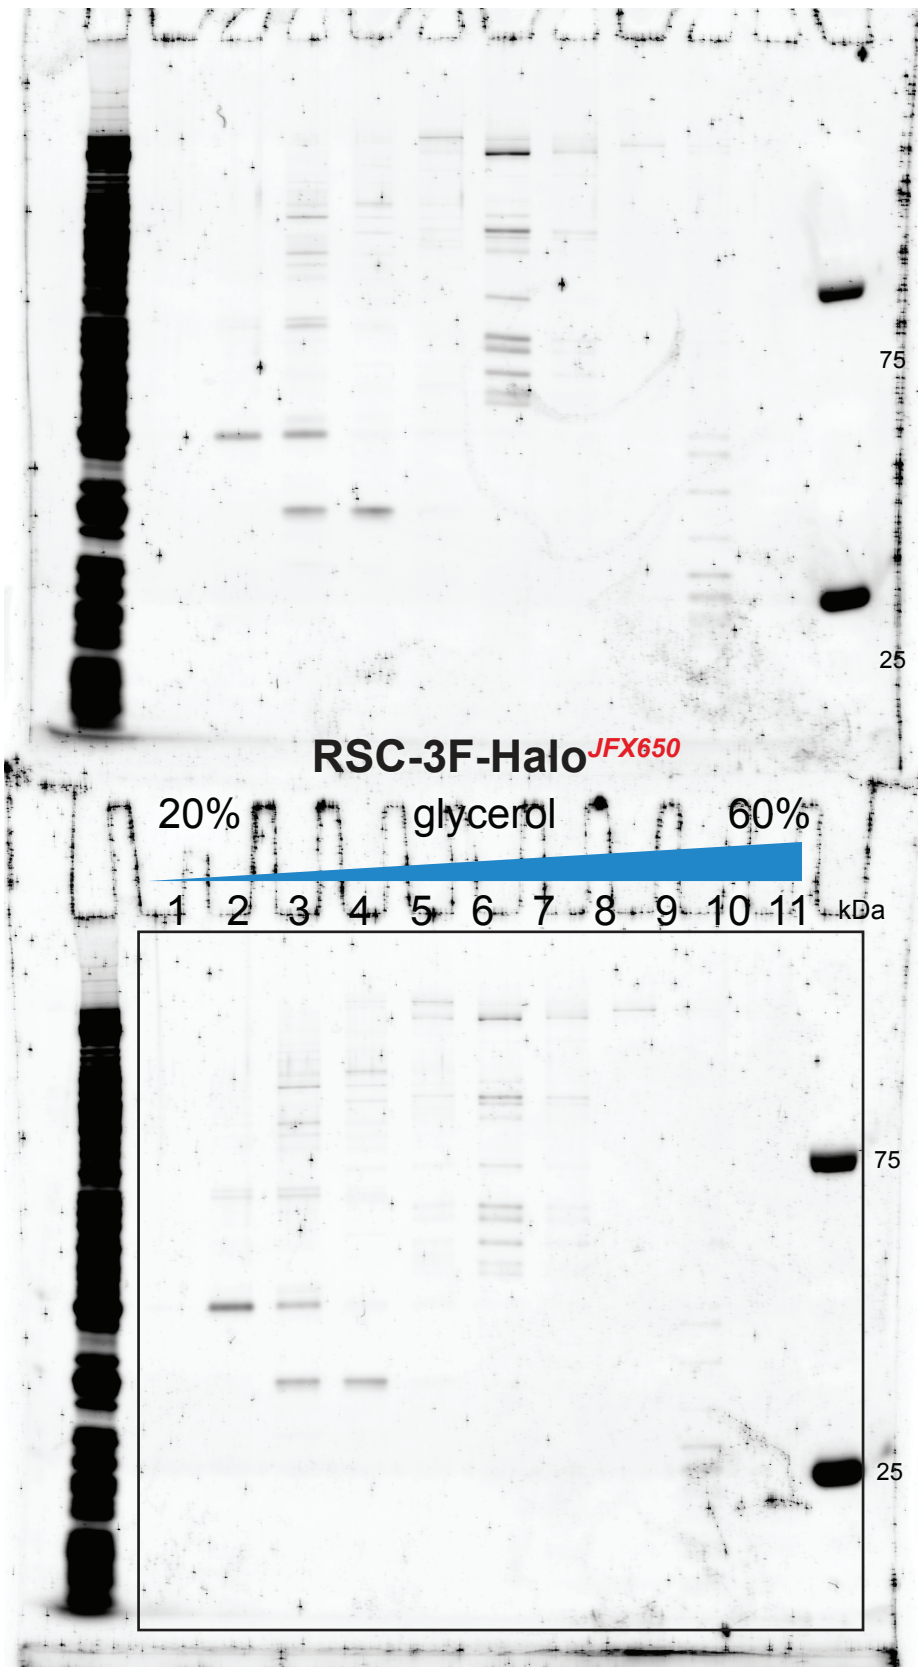

Flamingo stain channel excitation
