# Supplementary material for: Dynamic 1D search and processive nucleosome translocations by RSC and ISW2 chromatin remodelers
Source: eLife journal article supplement (doi:10.7554/elife.91433), 2023-11-23
Supplement: fig1-figsupp2-data14 [file elife-91433-fig1-figsupp2-data14-v1.pdf]

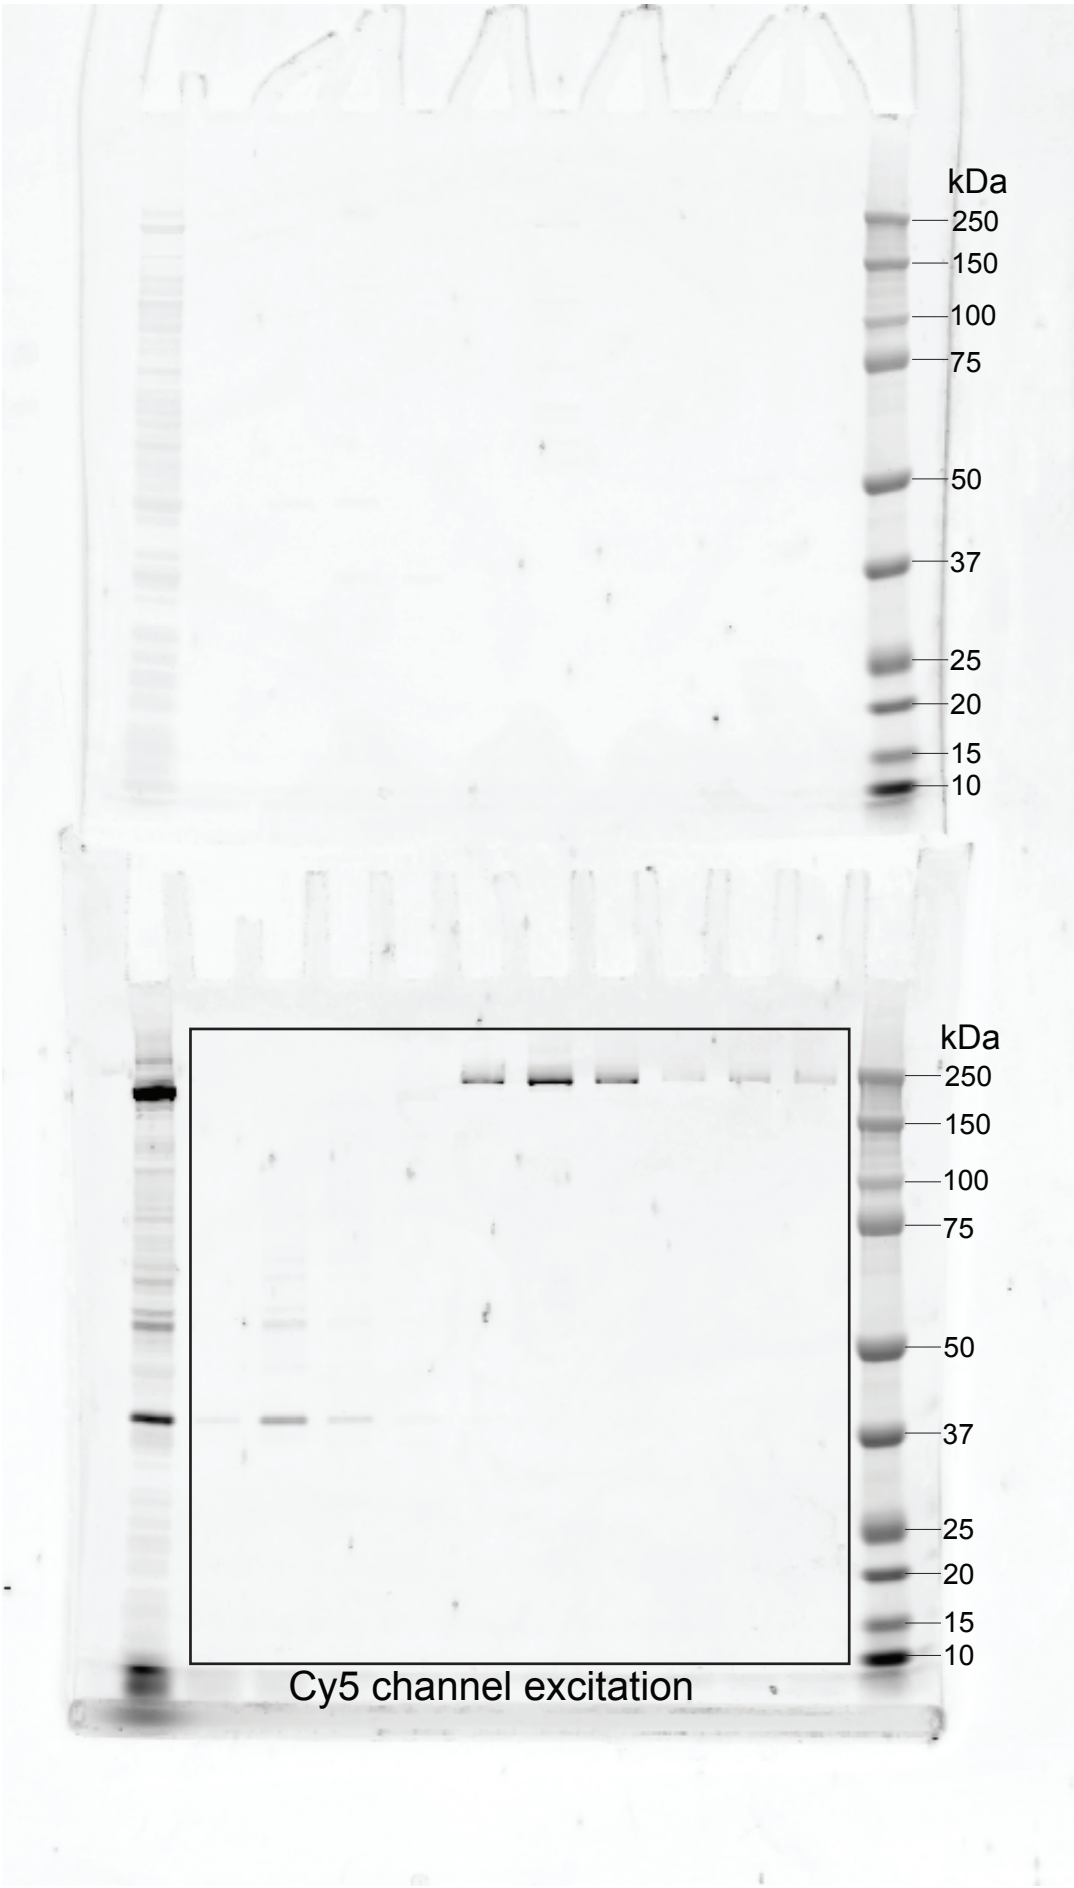

kDa

- 250
- 150
- 100
- 75
- 50
- 37
- 25
- 20
- 15
- 10

kDa

- 250
- 150
- 100
- 75
- 50
- 37
- 25
- 20
- 15
- 10

Cy5 channel excitation
