# Supplementary figures and images for: Dynamic 1D search and processive nucleosome translocations by RSC and ISW2 chromatin remodelers
Source: eLife journal article supplement (doi:10.7554/elife.91433), 2023-11-23

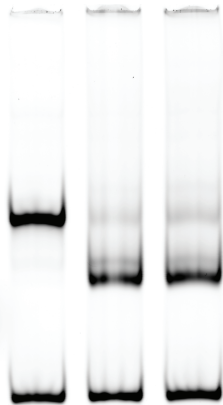

Supplement: fig1-figsupp2-data1 [file elife-91433-fig1-figsupp2-data1-v1.zip]

RSC (Sth1-3F-Halo)

30°C

30"

15"

30"

—

+

+

1 mM ATP

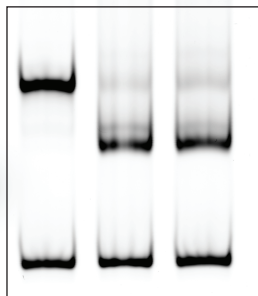

Supplement: fig1-figsupp2-data2 [file elife-91433-fig1-figsupp2-data2-v1.zip]

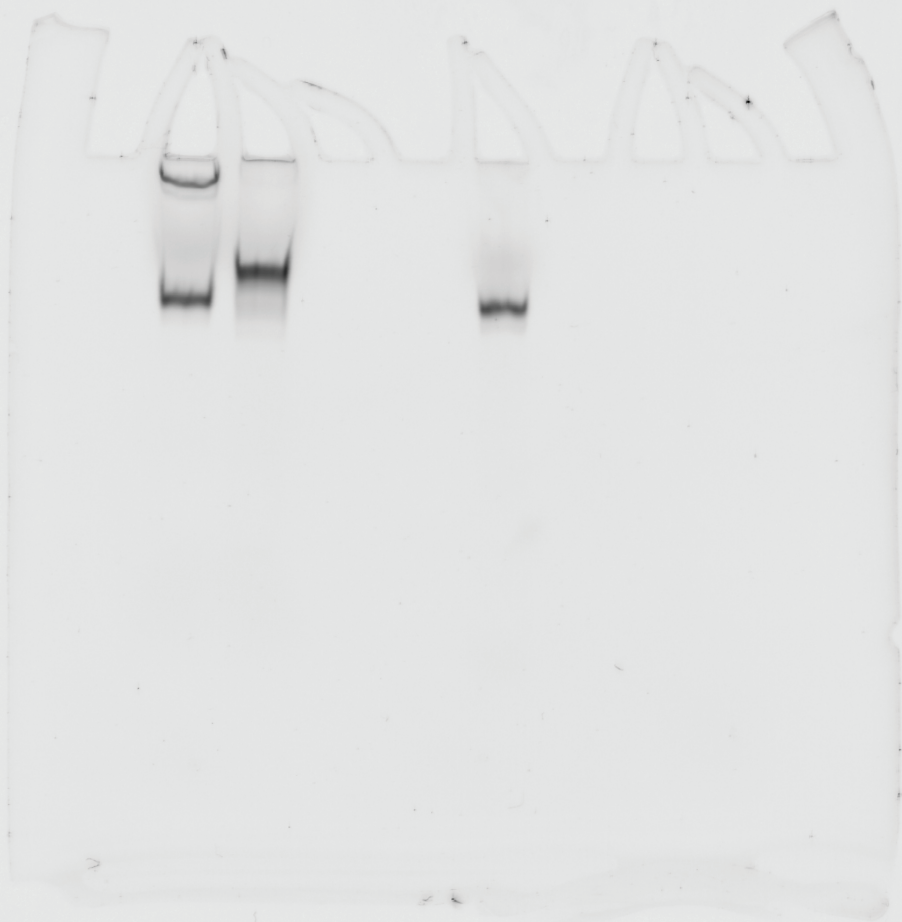

Supplement: fig1-figsupp2-data3 [file elife-91433-fig1-figsupp2-data3-v1.zip]

ISW2 (Isw2-3F-Halo)  
30°C 30" 30"  
1 mM ATP — +  
80N3;  
Cy5-DNA  
Cy3-H2A

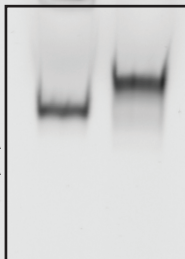

Supplement: fig1-figsupp2-data4 [file elife-91433-fig1-figsupp2-data4-v1.zip]

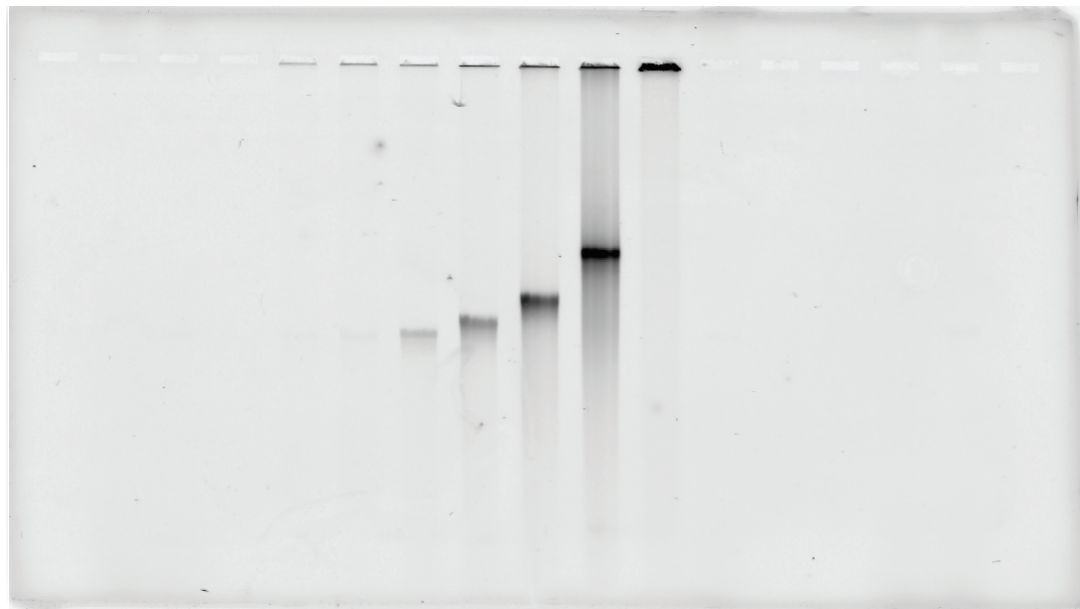

Supplement: fig3-figsupp1-data3 [file elife-91433-fig3-figsupp1-data3-v1.zip]

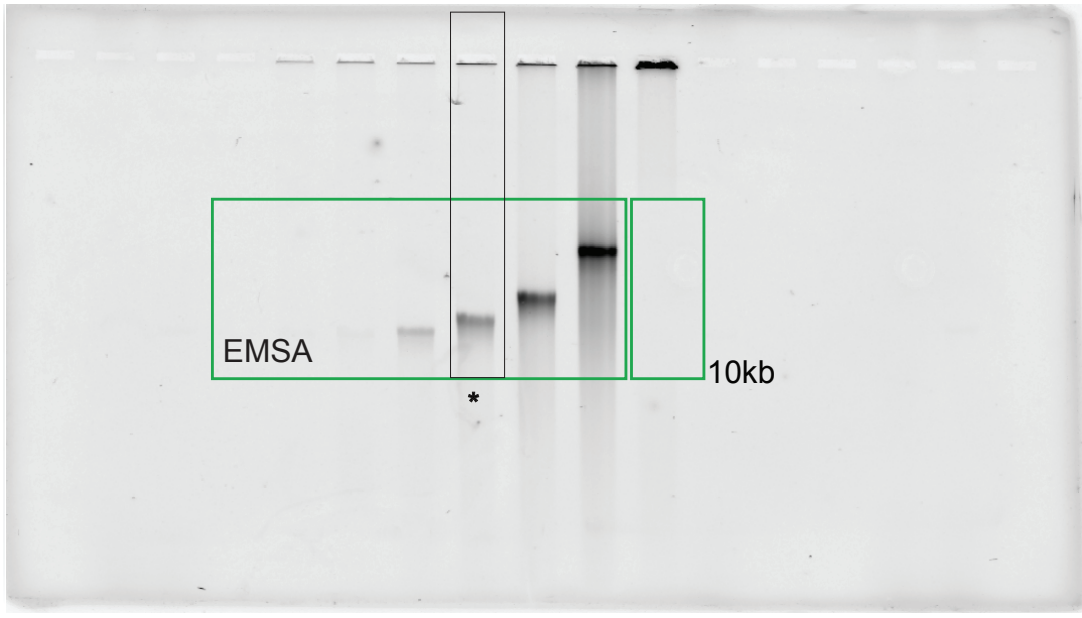

Supplement: fig3-figsupp1-data4 [file elife-91433-fig3-figsupp1-data4-v1.zip]
